# Supplementary material
Source: PubMed Central journal article supplement (PMC7989243)
Supplement: ehp8719.s001.acco.pdf [file ehp8719.s001.acco.pdf]

**Note to readers with disabilities:** *EHP* strives to ensure that all journal content is accessible to all readers. However, some figures and Supplemental Material published in *EHP* articles may not conform to [508 standards](#) due to the complexity of the information being presented. If you need assistance accessing journal content, please contact [ehp508@niehs.nih.gov](mailto:ehp508@niehs.nih.gov). Our staff will work with you to assess and meet your accessibility needs within 3 working days.

### **Supplemental Material**

#### **Contribution of Long-Term Exposure to Outdoor Black Carbon to the Carcinogenicity of Air Pollution: Evidence regarding Risk of Cancer in the Gazel Cohort**

Emeline Lequy, Jack Siemiatycki, Kees de Hoogh, Danielle Vienneau, Jean-François Dupuy, Valérie Garès, Ole Hertel, Jesper Heile Christensen, Sergey Zhivin, Marcel Goldberg, Marie Zins, and Bénédicte Jacquemin

#### **Table of Contents**

**Figure S1. Flowchart of the selection of Gazel participants included in the analyses pertaining to all-site and lung cancer.**

**Figure S2. Mean and standard deviation of the synthetic values plotted against iteration number for the imputed data. Smokpac: smoking pack-years; fdep2009: deprivation index (put back as nonimputed values in the final database); smokpas: passive smoking at work or at home; alcoclass: alcohol consumption; family1: marital status; vegfr: fruit and vegetable intake; ses: socioeconomic status; educ1: education; density2: urban classification (put back as nonimputed values in the final database).**

**Figure S3. On the top tier, exposure-response relationship between cumulative air pollutant (x-axis: black carbon in  $10^{-5}/m$ ,  $PM_{2.5}$  in  $\mu g/m^3$ , and  $NO_2$  in  $\mu g/m^3$ ) and all-site cancer risk in the Gazel cohort (using a 3-degree of freedom spline function); on the bottom tier, the corresponding distribution of the exposure among the 293,210 person-years for the all-site cancer analysis (3,711 cases). Hazard ratios and confidence intervals estimated by separate single-pollutant Cox model with attained age as underlying time-scale and time-dependent variables, adjusted for sex, cumulative smoking pack-years, passive smoking, alcohol use, BMI, education, socioeconomic status, family status, vegetable and fruit consumption, occupational exposure to lung carcinogens, age at inclusion and calendar time. Exposures were lagged 10 years. Participants were excluded from the analysis if they were diagnosed with cancer before 1999.**

**Figure S4. Maps of the relative change (%) between the black carbon exposure assessment for all available Gazel participants between 1995 and 2000 (left, reference year 1995) and 2000 and 2005 (right, reference year 2000). For example, the dark orange values indicate that the black carbon estimates were up to 50% higher in 2000 than in 1995 and the dark blue values that black carbon estimates were up to 70% lower in 2005 than in 2000.**

**Table S1. Cancer cases breakdown by year for all-site cancer and lung cancer in the study period (1999-2015), as numbers and cumulative percentages.** Cases diagnosed during 1989–1998 were excluded, thereby limiting the study period to 1999–2015.

**Table S2. Cancer cases breakdown by site for first-occurring cases of all-site cancer in the study period (1999-2015), as numbers and percentages.** Cases diagnosed during 1989–1998 were excluded, thereby limiting the study period to 1999–2015.

**Table S3. Associations between black carbon and its residuals and PM<sub>2.5</sub> (in separate single-pollutant models) with incident all-site and lung cancer as hazard ratios (HR) and their 95% confidence intervals (CI), implementing either a 10-year or a 2-year lag period.**

**Table S4. Associations between cumulative black carbon (top half) and PM<sub>2.5</sub> (bottom half) and all-site incident cancer in the main, sensitivity, and stratified analyses with the number of identified cancer cases among the number of participant-year over the follow-up, implementing a 10-year lag period. These numbers correspond to Figure 2.**

**Table S5. Associations between cumulative black carbon (top half) and PM<sub>2.5</sub> (bottom half) and lung incident cancer in the main and sensitivity analyses with the number of identified cancer cases among the number of participant-year over the follow-up. These numbers corresponding to Figure 3.**

Supplementary Figures

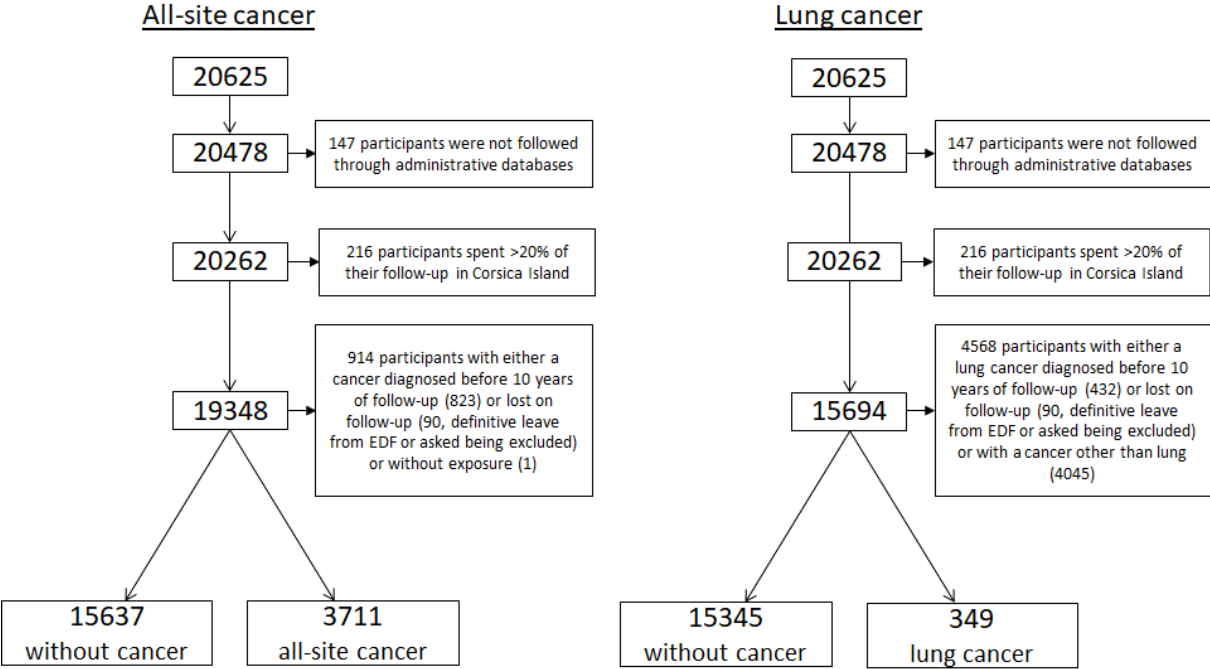

**Figure S1: flowchart of the selection of Gazel participants included in the analyses pertaining to all-site and lung cancer.**

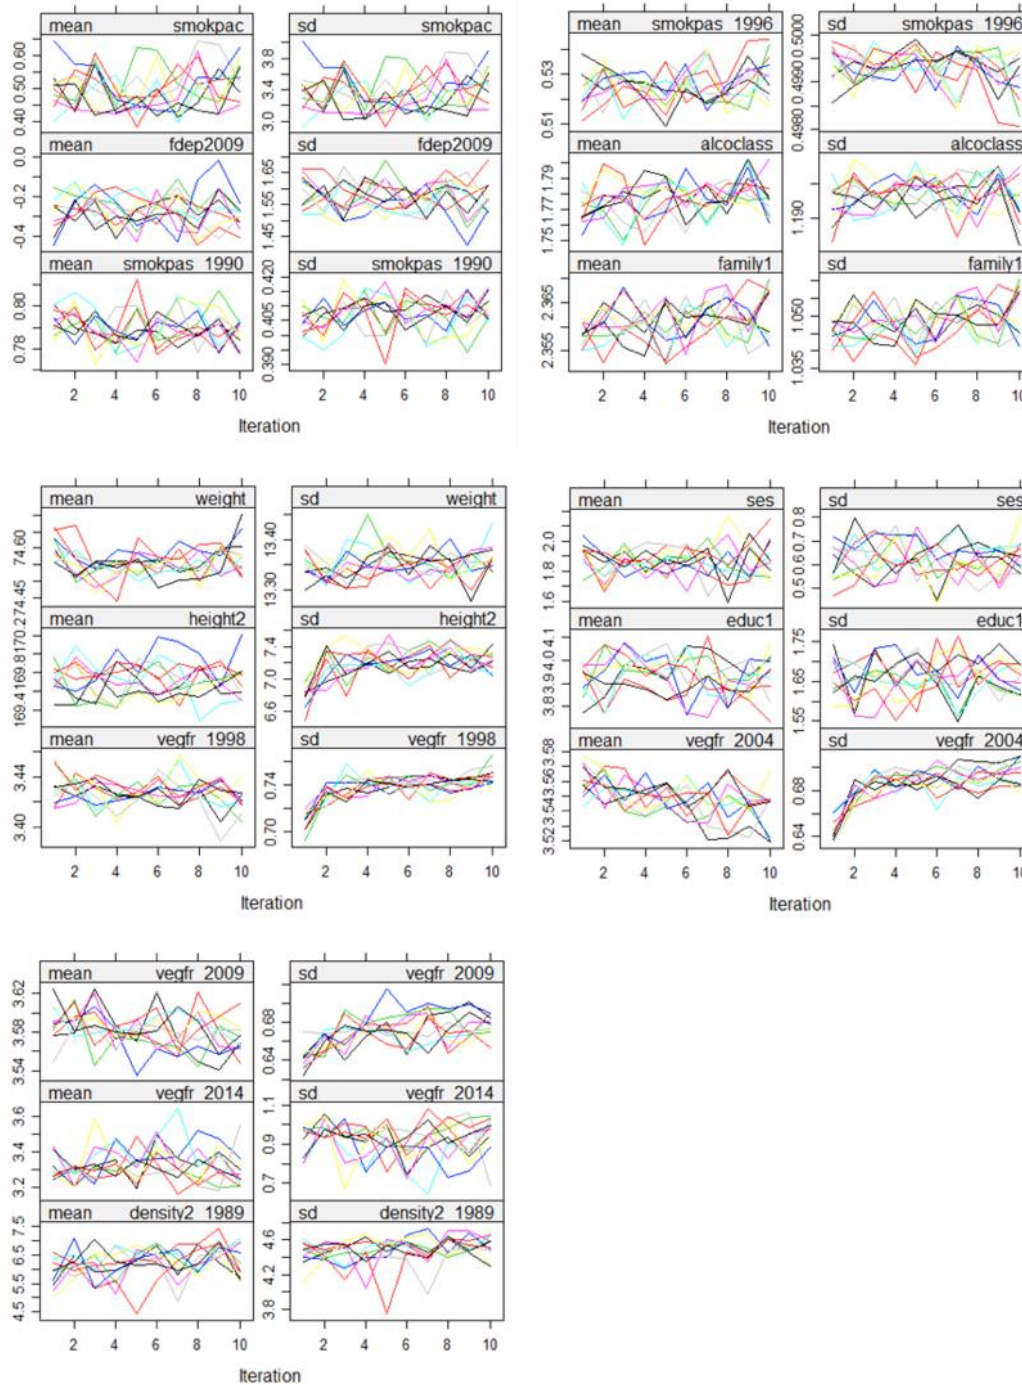

**Figure S2: Mean and standard deviation of the synthetic values plotted against iteration number for the imputed data. Smokpac: smoking pack-years; fdep2009: deprivation index (put back as nonimputed values in the final database); smokpas: passive smoking at work or at home; alcoclass: alcohol consumption; family1: marital status; vegfr: fruit and vegetable intake; ses: socioeconomic status; educ1: education; density2: urban classification (put back as nonimputed values in the final database).**

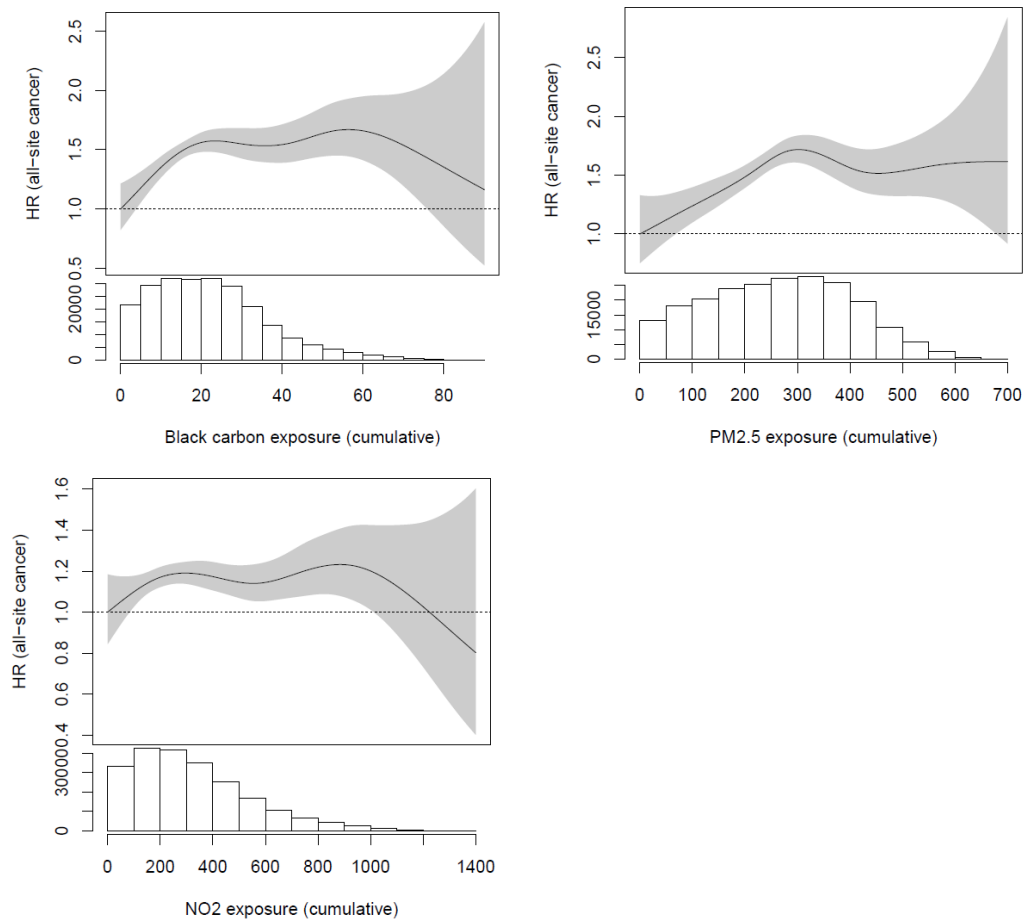

**Figure S3: on the top tier, exposure-response relationship between cumulative air pollutant (x-axis: black carbon in  $10^{-5}/m$ , PM2.5 in  $\mu g/m^3$ , and NO2 in  $\mu g/m^3$ ) and all-site cancer risk in the Gazel cohort (using a 3-degree of freedom spline function); on the bottom tier, the corresponding distribution of the exposure among the 293,210 person-years for the all-site cancer analysis (3,711 cases).** Hazard ratios and confidence intervals estimated by separate single-pollutant Cox model with attained age as underlying time-scale and time-dependent variables, adjusted for sex, cumulative smoking pack-years, passive smoking, alcohol use, BMI, education, socioeconomic status, family status, vegetable and fruit consumption, occupational exposure to lung carcinogens, age at inclusion and calendar time. Exposures were lagged 10 years. Participants were excluded from the analysis if they were diagnosed with cancer before 1999.

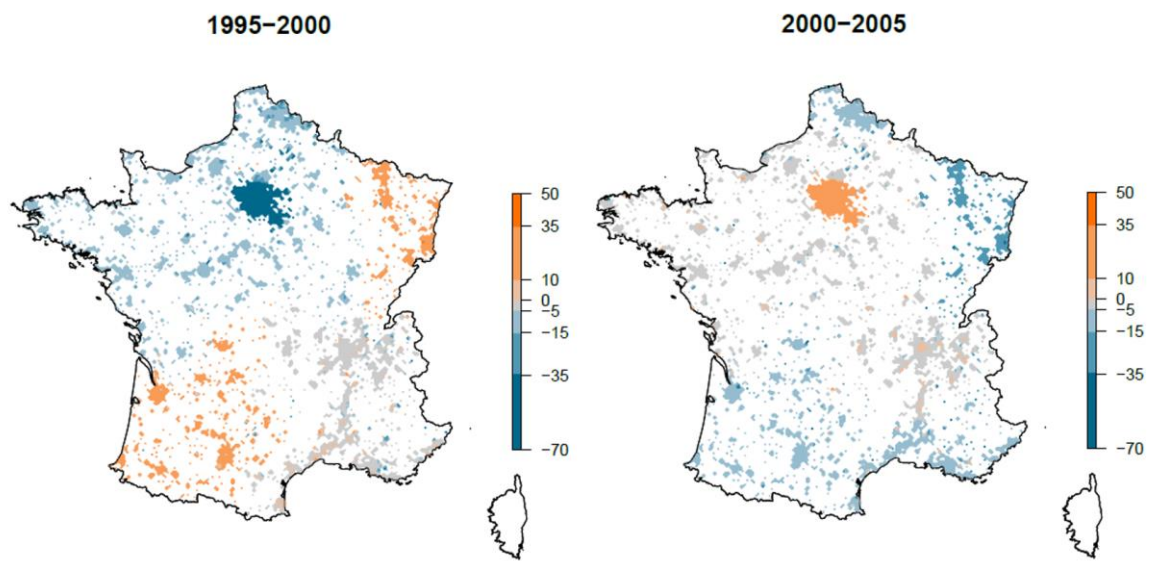

**Figure S4: maps of the relative change (%) between the black carbon exposure assessment for all available Gazel participants between 1995 and 2000 (left, reference year 1995) and 2000 and 2005 (right, reference year 2000). For example, the dark orange values indicate that the black carbon estimates were up to 50% higher in 2000 than in 1995 and the dark blue values that black carbon estimates were up to 70% lower in 2005 than in 2000.**

## Supplementary Tables

**Table S1: cancer cases breakdown by year for all-site cancer and lung cancer in the study period (1999-2015), as numbers and cumulative percentages.** Cases diagnosed during 1989–1998 were excluded, thereby limiting the study period to 1999–2015

| Cancer type/year | 1999 | 2000 | 2001 | 2002 | 2003 | 2004 | 2005 | 2006 | 2007 | 2008 | 2009 | 2010 | 2011 | 2012 | 2013 | 2014 | 2015 |
|------------------|------|------|------|------|------|------|------|------|------|------|------|------|------|------|------|------|------|
| All-site (n)     | 78   | 88   | 121  | 157  | 137  | 171  | 181  | 234  | 328  | 299  | 284  | 274  | 305  | 291  | 282  | 255  | 307  |
| (cumulative %)   | 2    | 4    | 8    | 12   | 15   | 20   | 25   | 31   | 39   | 47   | 55   | 62   | 70   | 78   | 85   | 92   | 100  |
| Lung (n)         | 9    | 5    | 5    | 6    | 13   | 10   | 6    | 16   | 33   | 26   | 30   | 28   | 28   | 33   | 37   | 35   | 40   |
| (cumulative %)   | 3    | 4    | 5    | 7    | 11   | 13   | 15   | 19   | 29   | 36   | 44   | 52   | 60   | 69   | 79   | 89   | 100  |

**Table S2: cancer cases breakdown by site for first-occurring cases of all-site cancer in the study period (1999-2015), as numbers and percentages.** Cases diagnosed during 1989–1998 were excluded, thereby limiting the study period to 1999–2015

| Cancer site               | N    | %   |
|---------------------------|------|-----|
| Prostate                  | 1301 | 34% |
| Breast                    | 378  | 10% |
| Colorectal                | 362  | 9%  |
| Hematopoietic             | 302  | 8%  |
| Bronchus and lung         | 256  | 7%  |
| Bladder                   | 250  | 6%  |
| Melanoma                  | 145  | 4%  |
| Kidney                    | 136  | 4%  |
| Female reproductive tract | 72   | 2%  |

**Table S3: associations between black carbon and its residuals and PM2.5 (in separate single-pollutant models) with incident all-site and lung cancer as hazard ratios (HR) and their 95% confidence intervals (CI), implementing either a 10-year or a 2-year lag period.**

| Lag (years) | Cancer site | Exposure variable                   | HR   | CI        | cases | person-years | p-value | AIC   |
|-------------|-------------|-------------------------------------|------|-----------|-------|--------------|---------|-------|
| 10          | All-site    | Black carbon <sup>a</sup>           | 1.17 | 1.06-1.29 | 3,711 | 293,210      | 0.001   | 65978 |
|             |             | Black carbon residuals <sup>b</sup> | 1.05 | 1.00-1.11 |       |              | 0.056   | 65984 |
|             |             | PM2.5 <sup>c</sup>                  | 1.20 | 1.06-1.34 |       |              | 0.003   | 65978 |
|             | Lung        | Black carbon <sup>a</sup>           | 1.31 | 0.93-1.83 | 349   | 254,154      | 0.12    | 5842  |
|             |             | Black carbon residuals <sup>b</sup> | 1.24 | 1.05-1.47 |       |              | 0.011   | 5838  |
|             |             | PM2.5 <sup>c</sup>                  | 1.01 | 0.68-1.51 |       |              | 0.942   | 5845  |
| 2           | All-site    | Black carbon <sup>a</sup>           | 1.17 | 1.06-1.29 | 3,708 | 292,664      | 0.002   | 65919 |
|             |             | Black carbon residuals <sup>b</sup> | 1.05 | 0.99-1.10 |       |              | 0.09    | 65925 |
|             |             | PM2.5 <sup>c</sup>                  | 1.21 | 1.06-1.38 |       |              | 0.004   | 65920 |
|             | Lung        | Black carbon <sup>a</sup>           | 1.21 | 0.85-1.71 | 348   | 253,646      | 0.293   | 5816  |
|             |             | Black carbon residuals <sup>b</sup> | 1.14 | 0.96-1.35 |       |              | 0.141   | 5815  |
|             |             | PM2.5 <sup>c</sup>                  | 1.08 | 0.68-1.72 |       |              | 0.752   | 5817  |

AIC: Akaike Information Criterion.

All-site cancer cases were defined as the whole ICD10 chapter except C77-79 (secondary malignant neoplasms) and C44 (nonmelanoma skin cancers); we used C34 to identify lung cancer cases. Participants were excluded from the analysis if they were diagnosed with cancer before 1999. Exposures were lagged 10 years (top half of the table) or 2 years (bottom half of the table).

Cox model with attained age as underlying time-scale, adjusted for Model 3 covariates (sex, calendar time, age at inclusion, cumulative smoking pack-years, passive smoking, alcohol use, body mass index, education, socioeconomic status, family status, vegetable and fruit consumption, occupational exposure to nine lung carcinogens). Missing covariate data were imputed using MICE. Model-based estimates were pooled following Rubin's rules.

a HRs are for one IQR increase in ln-transformed cumulative black carbon (IQR = 1.0).

b HRs are for one IQR increase in ln-transformed cumulative black carbon residuals regressed on ln-transformed cumulative PM2.5 (IQR = 0.3).

c HRs are for an IQR increase in ln-transformed cumulative PM2.5 (IQR = 0.9 for the 10-year lag analyses and IQR = 1.0 for the 2-year lag analyses)



**Table S4 : associations between cumulative black carbon (top half) and PM2.5 (bottom half) and all-site incident cancer in the main, sensitivity, and stratified analyses with the number of identified cancer cases among the number of participant-year over the follow-up, implementing a 10-year lag period. These numbers correspond to Figure 2.**

| Pollutant    | Population/model                                   | HR   | CI-lower | CI-upper | p.value | cases | person-years |
|--------------|----------------------------------------------------|------|----------|----------|---------|-------|--------------|
| Black carbon | All (main model)                                   | 1.17 | 1.06     | 1.29     | 0.001   | 3711  | 293210       |
|              | All (main model further adjusted for deprivation)  | 1.17 | 1.06     | 1.29     | 0.002   | 3711  | 293210       |
|              | Using only address-level geocodes                  | 1.17 | 1.00     | 1.36     | 0.056   | 1664  | 137092       |
|              | Participants with a follow-up longer than 20 years | 1.40 | 1.20     | 1.64     | 0.000   | 1962  | 278907       |
|              | Using only complete cases data                     | 1.02 | 0.87     | 1.19     | 0.809   | 1829  | 151037       |
|              | Considering missing data as a category             | 1.15 | 1.04     | 1.28     | 0.006   | 3711  | 293210       |
|              | Imputing missing data as the median/mode           | 1.19 | 1.08     | 1.31     | 0.001   | 3711  | 293210       |
|              | Female                                             | 1.16 | 0.96     | 1.41     | 0.129   | 755   | 81124        |
|              | Male                                               | 1.18 | 1.05     | 1.32     | 0.005   | 2956  | 212086       |
|              | Never Smoker                                       | 1.18 | 1.00     | 1.40     | 0.051   | 1252  | 113460       |
|              | Ever Smoker                                        | 1.17 | 1.04     | 1.33     | 0.012   | 2460  | 179750       |
|              | Nearest major road <500m                           | 1.23 | 1.03     | 1.47     | 0.023   | 1028  | 71602        |
|              | Nearest major road >500m                           | 1.16 | 1.02     | 1.31     | 0.024   | 2460  | 196254       |
|              | Urban                                              | 1.14 | 0.92     | 1.41     | 0.237   | 926   | 71915        |
|              | Semiurban                                          | 1.30 | 0.98     | 1.72     | 0.064   | 878   | 68923        |
| Rural        | 1.31                                               | 0.92 | 1.85     | 0.130    | 722     | 54668 |              |
| PM2.5        | All (main model)                                   | 1.20 | 1.06     | 1.34     | 0.003   | 3711  | 293210       |
|              | All (main model further adjusted for deprivation)  | 1.21 | 1.08     | 1.36     | 0.001   | 3711  | 293210       |
|              | Using only address-level geocodes                  | 1.29 | 1.07     | 1.57     | 0.009   | 1664  | 137092       |
|              | Participants with a follow-up longer than 20 years | 1.44 | 1.15     | 1.81     | 0.002   | 1962  | 278907       |
|              | Using only complete cases data                     | 1.12 | 0.91     | 1.37     | 0.296   | 1829  | 151037       |
|              | Considering missing data as a category             | 1.19 | 1.04     | 1.35     | 0.009   | 3711  | 293210       |
|              | Imputing missing data as the median/mode           | 1.20 | 1.07     | 1.35     | 0.002   | 3711  | 293210       |
|              | Female                                             | 1.24 | 0.97     | 1.57     | 0.080   | 755   | 81124        |
|              | Male                                               | 1.18 | 1.03     | 1.35     | 0.014   | 2956  | 212086       |
|              | Never Smoker                                       | 1.23 | 1.00     | 1.52     | 0.055   | 1252  | 113460       |
|              | Ever Smoker                                        | 1.19 | 1.03     | 1.38     | 0.019   | 2460  | 179750       |
|              | Nearest major road <500m                           | 1.26 | 1.01     | 1.56     | 0.039   | 1028  | 71602        |
|              | Nearest major road >500m                           | 1.19 | 1.03     | 1.37     | 0.015   | 2460  | 196254       |
|              | Urban                                              | 1.22 | 0.96     | 1.56     | 0.118   | 926   | 71915        |
|              | Semiurban                                          | 1.17 | 0.91     | 1.50     | 0.231   | 878   | 68923        |
| Rural        | 1.12                                               | 0.86 | 1.46     | 0.398    | 722     | 54668 |              |

Hazard ratios and confidence intervals expressed for one IQR increase of cumulative exposure to black carbon or PM2.5 in separate single-pollutant Cox model with attained age as underlying time-scale and time-dependent variables, adjusted for sex, cumulative smoking pack-years, passive smoking, alcohol use, BMI, education, socioeconomic status, family status, fruit and vegetable consumption, occupational exposure to lung carcinogens, age at inclusion and calendar time. Exposures were lagged 10 years. Participants were excluded from the analysis if they were diagnosed with cancer before 1999. Unless specified otherwise, these model-based estimates were computed using MICE to address missing data, and were pooled following Rubin's rules.

**Table S5: associations between cumulative black carbon (top half) and PM2.5 (bottom half) and lung incident cancer in the main and sensitivity analyses with the number of identified cancer cases among the number of participant-year over the follow-up. These numbers corresponding to Figure 3.**

| Pollutant                                          | Population/model                                   | HR               | CI-lower | CI-upper | p-value | cases | person-years |
|----------------------------------------------------|----------------------------------------------------|------------------|----------|----------|---------|-------|--------------|
| Black carbon                                       | All (main model)                                   | 1.31             | 0.93     | 1.83     | 0.118   | 349   | 254154       |
|                                                    | All (main model further adjusted for deprivation)  | 1.36             | 0.98     | 1.89     | 0.070   | 349   | 254154       |
|                                                    | Using all non lung cases as controls               | 1.33             | 0.94     | 1.87     | 0.103   | 349   | 318074       |
|                                                    | Using only address-level geocodes                  | 1.66             | 0.85     | 3.24     | 0.141   | 110   | 118980       |
|                                                    | Participants with a follow-up longer than 20 years | 1.67             | 1.05     | 2.66     | 0.030   | 225   | 250525       |
|                                                    | Using only complete cases data                     | 0.71             | 0.35     | 1.43     | 0.336   | 101   | 131264       |
|                                                    | Considering missing data as a category             | 1.40             | 1.01     | 1.96     | 0.000   | 349   | 254154       |
|                                                    | Imputing missing data as the median/mode           | 1.41             | 0.09     | 22.38    | 0.042   | 349   | 254154       |
|                                                    | PM2.5                                              | All (main model) | 1.01     | 0.68     | 1.51    | 0.942 | 349          |
| All (main model further adjusted for deprivation)  |                                                    | 1.14             | 0.77     | 1.68     | 0.523   | 349   | 254154       |
| Using all non lung cases as controls               |                                                    | 1.04             | 0.69     | 1.55     | 0.863   | 349   | 318074       |
| Using only address-level geocodes                  |                                                    | 2.30             | 0.85     | 6.18     | 0.099   | 110   | 118980       |
| Participants with a follow-up longer than 20 years |                                                    | 1.56             | 0.79     | 3.11     | 0.202   | 225   | 250525       |
| Using only complete cases data                     |                                                    | 0.82             | 0.35     | 1.92     | 0.642   | 101   | 131264       |
| Considering missing data as a category             |                                                    | 1.15             | 0.76     | 1.76     | 0.000   | 349   | 254154       |
| Imputing missing data as the median/mode           |                                                    | 1.06             | 0.13     | 8.43     | 0.771   | 349   | 254154       |

Hazard ratios and confidence intervals expressed for one IQR increase in ln-transformed cumulative exposure to black carbon or PM2.5 in separate single-pollutant Cox model with attained age as underlying time-scale and time-dependent variables, adjusted for sex, cumulative smoking pack-years, passive smoking, alcohol use, BMI, education, socioeconomic status, family status, fruit and vegetable consumption, occupational exposure to lung carcinogens, age at inclusion and calendar time. Exposures were lagged 10 years. Participants were excluded from the analysis if they were diagnosed with cancer before 1999. Unless specified otherwise, these model-based estimates were computed using MICE to address missing data, and were pooled following Rubin's rules).
